# Supplementary material for: Prostate cancer-derived holoclones: a novel and effective model for evaluating cancer stemness
Source: PubMed Central journal article supplement (PMC7347552; doi:10.1038/s41598-020-68187-9), 2020-07-09
Supplement: 41598_2020_68187_MOESM1_ESM.pdf [file 41598_2020_68187_MOESM1_ESM.pdf]

## **Supplementary information**

### **Prostate cancer-derived holoclones: a novel and effective model for evaluating cancer stemness**

Louise Flynn, Martin P. Barr, Anne-Marie Baird, Paul Smyth, Orla M. Casey, Gordon Blackshields, John Greene, Stephen R. Pennington, Emily Hams, Padraic G. Fallon, John O'Leary, Orla Sheils and Stephen P. Finn

### Stem cell markers are expressed in prostate cancer cell lines

A panel of four cell lines (DU145, PC-3, 22Rv1 and LNCaP) were assessed for a specific stem cell marker signature (integrin  $\alpha 2\beta 1$ hi, CD44+ and CD133+) using FACS (n=1; Supplementary Fig. 1). This panel was identified through a concise review of relevant literature published in peer reviewed journals [27]. This signature was differentially expressed across the cell line panel (Supplementary Table S1 and Supplementary Fig. 1). While integrin  $\alpha 2\beta 1$  and CD44 were highly expressed in all 4 cell lines, a larger percentage of LNCaP cells were positive for CD133 (16.9%).

#### (i) DU145

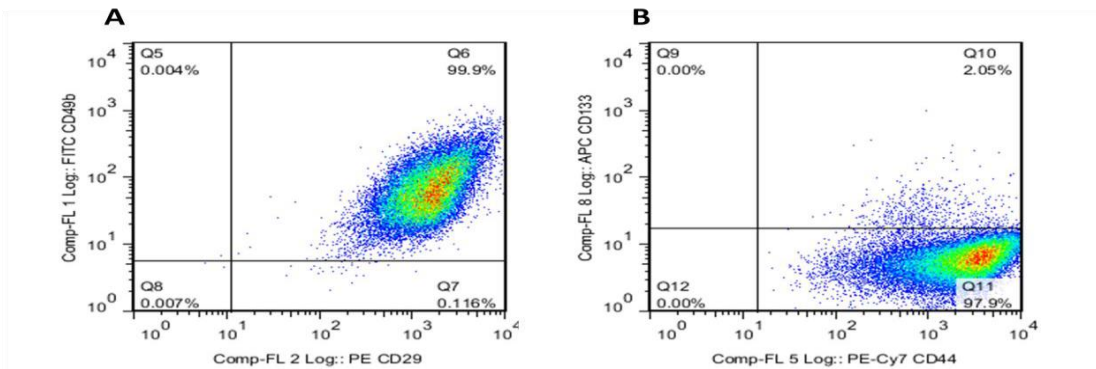

#### (ii) PC-3

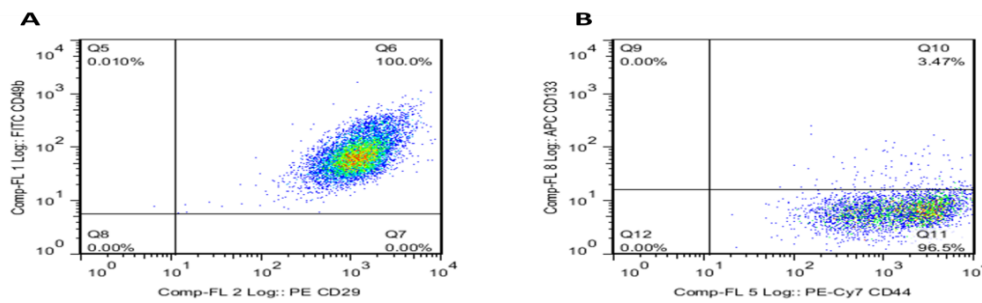

#### (iii) 22Rv1

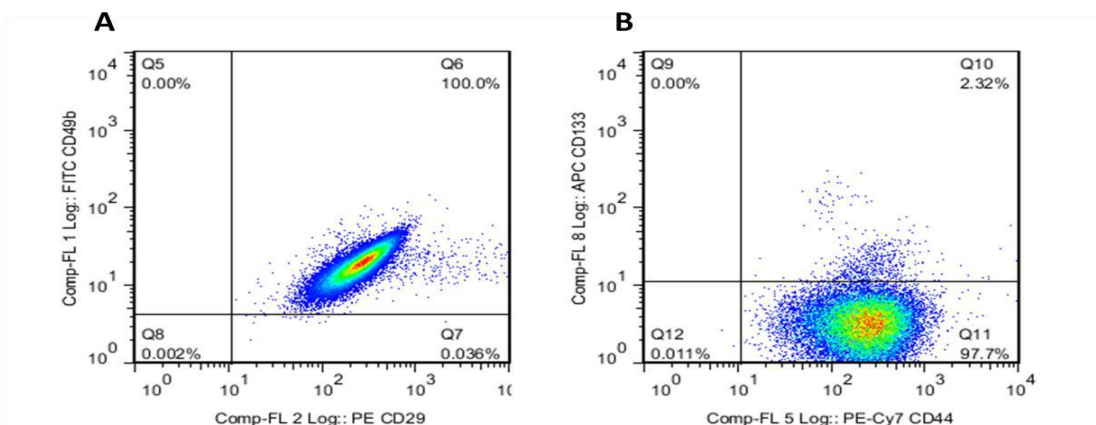

(iv) LNCaP

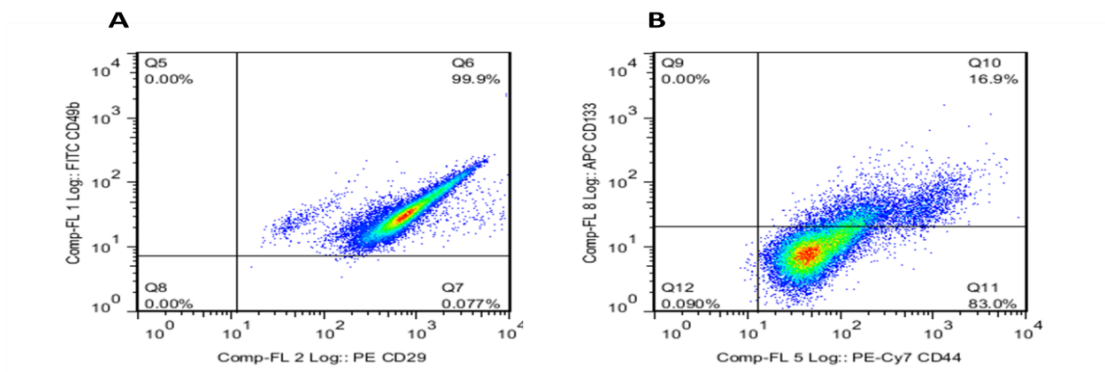

**Supplementary Figure 1:** Flow cytometry dot plots for (i) DU145, (ii) PC-3, (iii) 22Rv1 and (iv) LNCaP, demonstrating (A) integrin  $\alpha 2 \beta 1$  and (B) CD44/CD133 expression. (n=1)

### PC-3 and DU145 Cells Exhibit Differential Propensities to Efficiently Generate Heterogeneous Colonies

PC-3 and DU145 cells were found to exhibit disparate abilities to generate phenotypically plastic colonies. Across three biological replicates (n=15 plates/replicate), 20% of the colonies produced by PC-3 cells comprised of holoclones (Fig. S2A), while the majority of colonies produced were meroclones (64%). Paraclones generated at a rate similar to holoclones (16%). Conversely, under the same parameters, 43% of the total colonies produced by DU145 cells constituted holoclones (Fig. S2A). Furthermore, meroclones were produced at a rate similar to holoclones (44%) while paraclones comprised 13% of the colony total. PC-3 cells demonstrated the ability to generate more Colony Forming Units compared to DU145 cells for all types of clones formed (Fig. S2B).

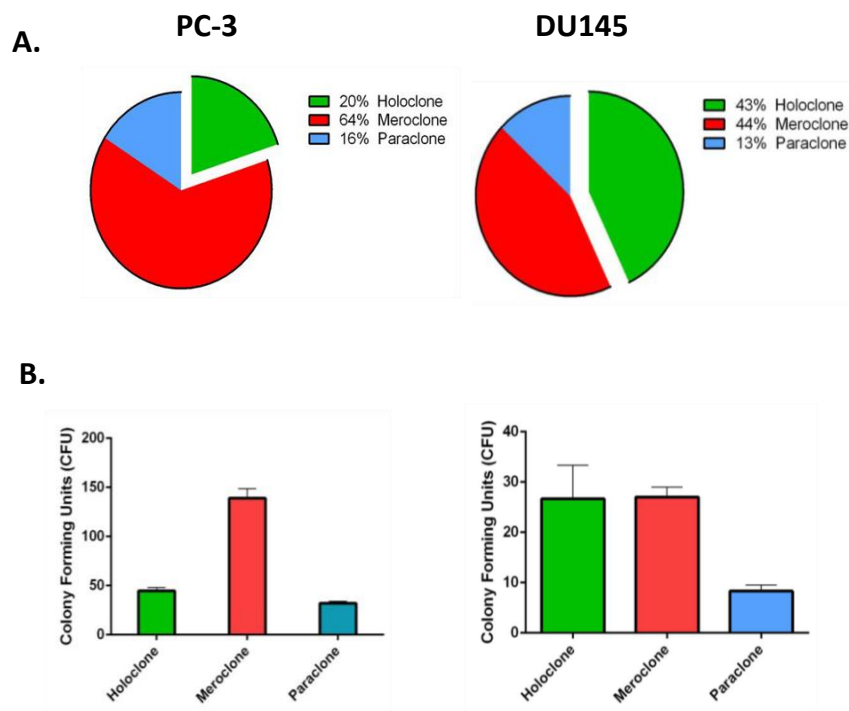

#### Supplementary Figure 2: Colony forming efficiency.

(A) Percentage of distinct colonies produced by PC-3 and DU145 cells expressed as a proportion of total colonies produced across multiple experiments (n=3, 15 plates/experiment). (B) Colony forming units for PC-3 and DU145 cells across multiple experiments. Data represented as Mean ± SEM (n=3, 15 plates/experiment).

### Holoclones only can regenerate all colony morphologies

Dissociation of distinct PC-3 and DU145 colonies, expansion within a 12-well dish and subsequent resubmission to monoclonal cultivation demonstrated that only holoclones had the capability to regenerate all colony morphologies (Fig. S3). Meroclones were found to regenerate only meroclones and paraclones, while paraclones exhibited modest ability to regenerate their own morphology (Fig. S3). Furthermore, dissociation and re-plating of PC-3 and DU145 holoclones resulted in a higher frequency of holoclone generation than observed in first-round plating.

#### (i) PC-3

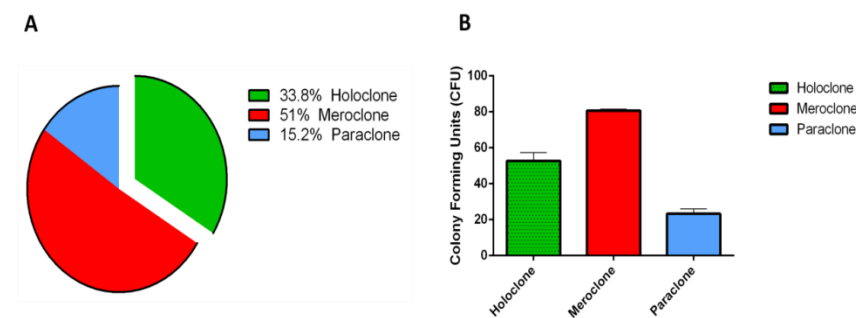

#### (ii) DU145

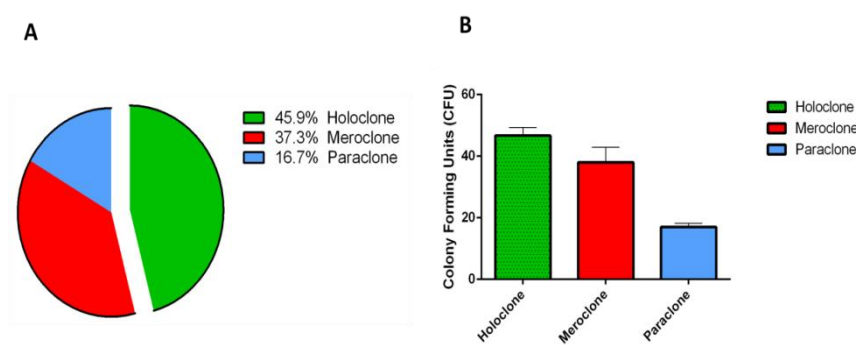

**Supplementary Figure 3:** Only holoclones had the ability to regenerate all colony morphologies.

PC-3 (i) and DU145 (ii) re-plated holoclones generated a larger number of holoclones than parental cells. (A) Percentage of distinct colonies produced by cells expressed as a proportion of total colonies produced across multiple experiments (n=3, 15 plates/experiment). (B) Colony forming units of cells across multiple experiments (n=3, 5 plates per experiment). Data represented as Mean ± SEM.

### **Prostatospheres display altered expression of a stem-associated gene panel**

The ability of PC-3 and DU145 cells to generate three-dimensional prostatospheres was assayed by culture in serum-free medium supplemented with EGF, bFGF, BSA and insulin<sup>37</sup>. Briefly, Dulbecco's Modified Eagles Medium/Nutrient Mixture F-12 Ham (Sigma Aldrich, St. Louis, MO, USA) was supplemented with 0.4% BSA (Sigma Aldrich, St. Louis, MO, USA), 1% penicillin streptomycin (Sigma Aldrich, St. Louis, MO, USA), 2.5 mg insulin (Gibco®, Life Technologies, Biosciences, Ireland), 5 µg recombinant human fibroblast growth factor (FGF) (Cell Signalling, MA, USA), and 10 µg recombinant human epidermal growth factor (Peprotech, New Jersey, USA). Cells were seeded at low density ( $1 \times 10^4$ ) in a T25 flask and observed every 2-3 days for sphere formation. Neither PC-3 nor DU145 cells generated morphologically unique spheres. Both cell lines displayed growth patterns equivalent to culture in standard medium. However, cells were harvested at 14 days and their stem phenotype assessed by examining the expression of the stem-associated gene panel. Samples were normalised to the relevant parental cell line. OCT4/POU5F1 ( $p= 0.01$ ), NANOG ( $p= 0.002$ ), and SOX2 ( $p= 0.001$ ) were found upregulated in DU145 cells grown in stem cell medium (Fig S4A). CD44 and CD133 were also upregulated but did not reach significance. ALDH1 was found to be downregulated in DU145 'sphere' cells. All stem-associated genes were upregulated in PC-3 cells cultured in stem cell medium but did not reach significance (Fig. S4B).

(A) DU145

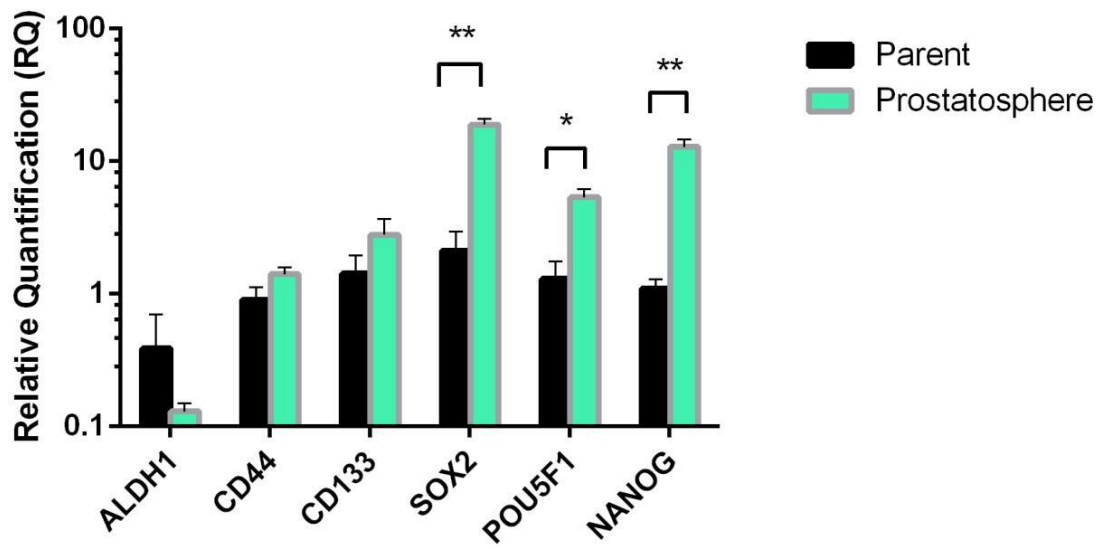

(B) PC-3

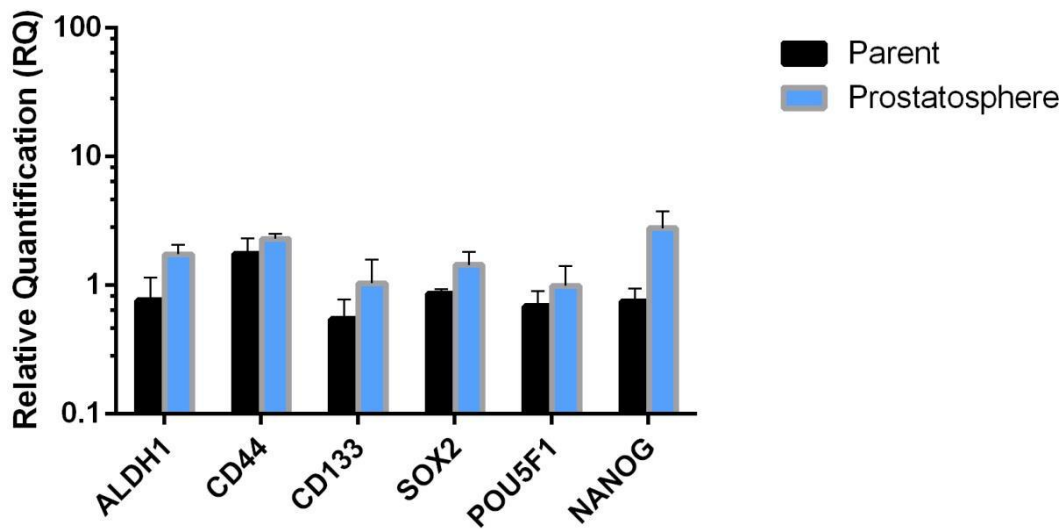

**Supplementary Figure 4:** Stemness gene expression analysis in (A) DU145 and (B) PC-3 'prostatospheres' (cells cultured in stem cell medium) (n=3). Relative quantification (RQ) of change in expression of stem-associated genes in holoclones normalised to parental controls. Data represented as Mean  $\pm$  SEM (\*p<0.05, \*\*p<0.01, unpaired Student's two-tailed t test, n=3).

## Validation of selected miRNAs in PC-3 and DU145 control (parental) and holoclone derived cells

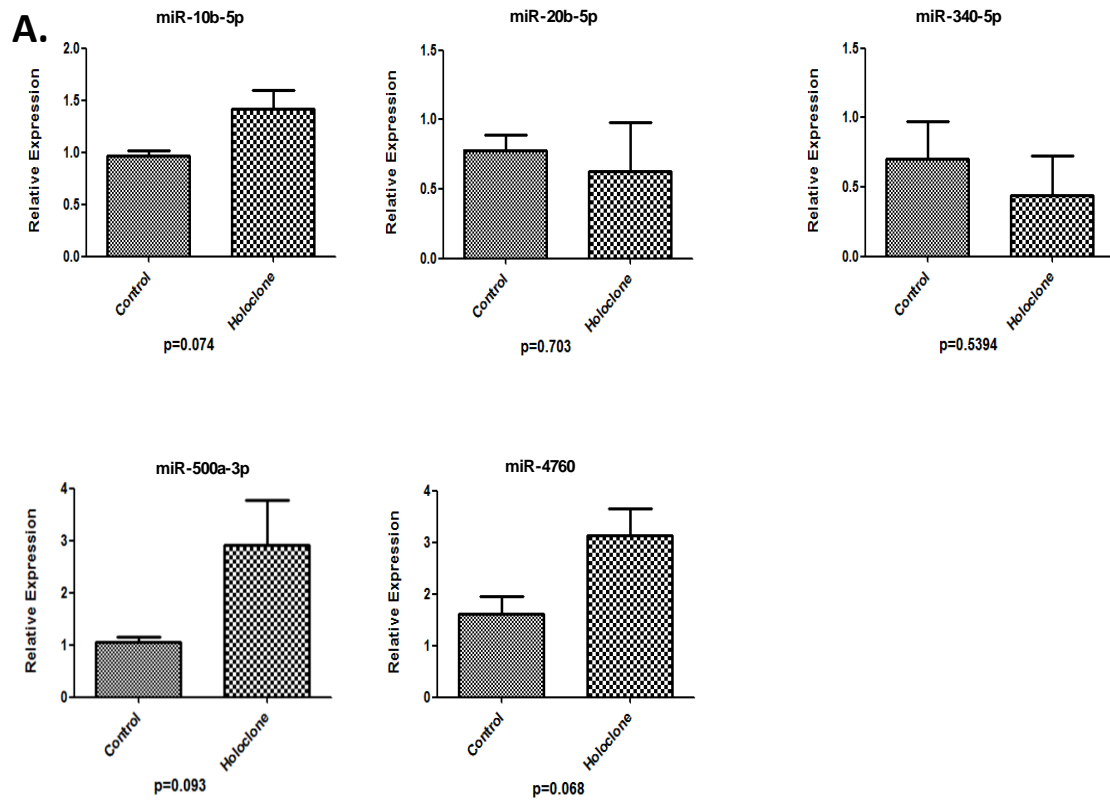



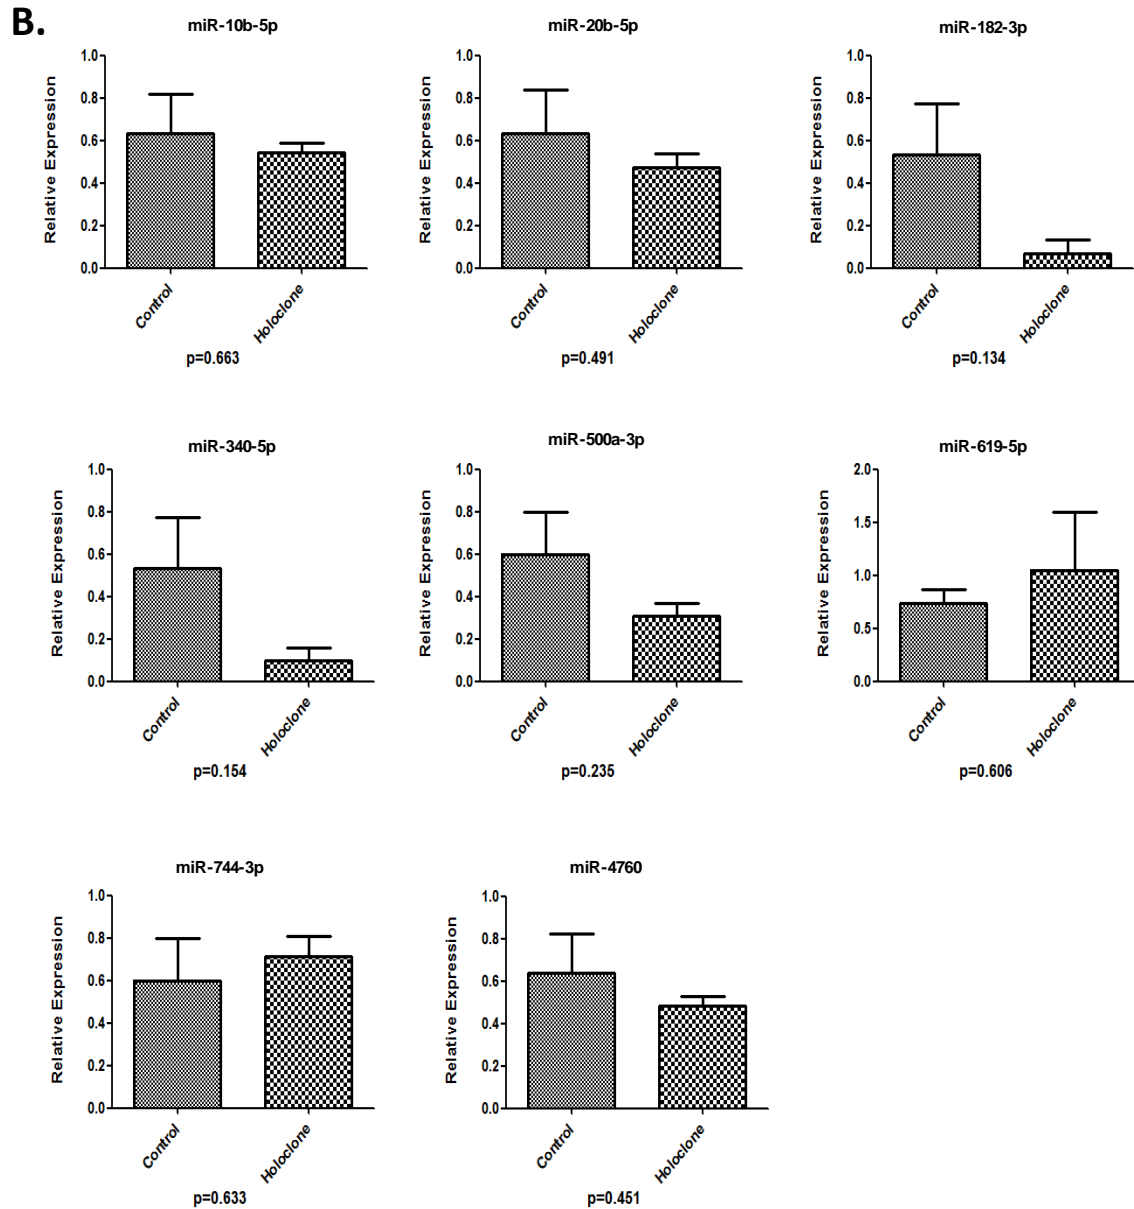

**Supplementary Figure 5:** Validation of selected miRNAs in PC-3 (A) and DU145 (B) control (parental) and holoclone derived cells.

(Relative quantification of change in expression of stem-associated genes in holoclones normalised to parental control). Data represented as Mean  $\pm$  SEM. (unpaired student's two-tailed *t* test,  $n=3$ ).

# Network of miRNA: target interactions (MTIs)

A.

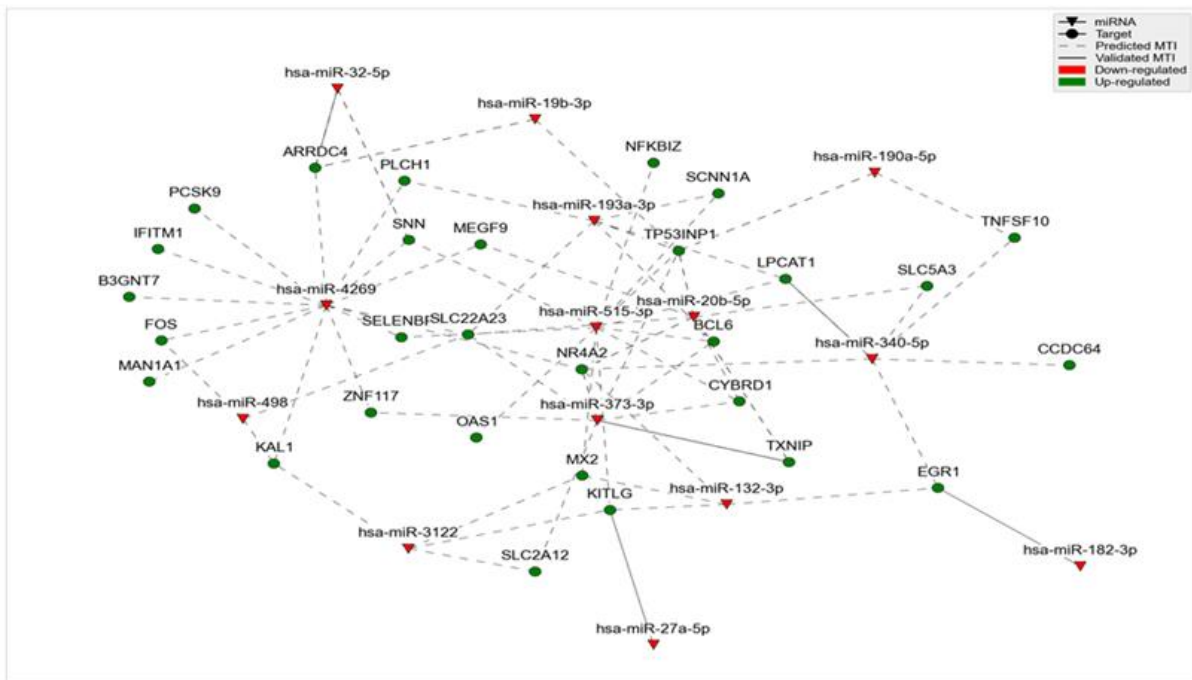

B.

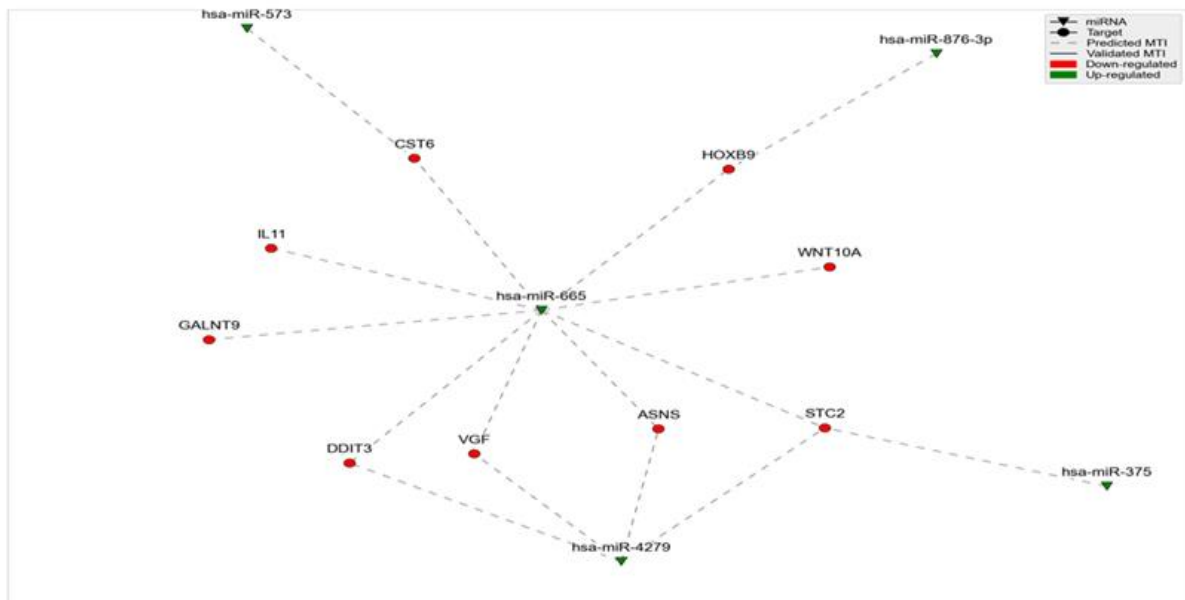

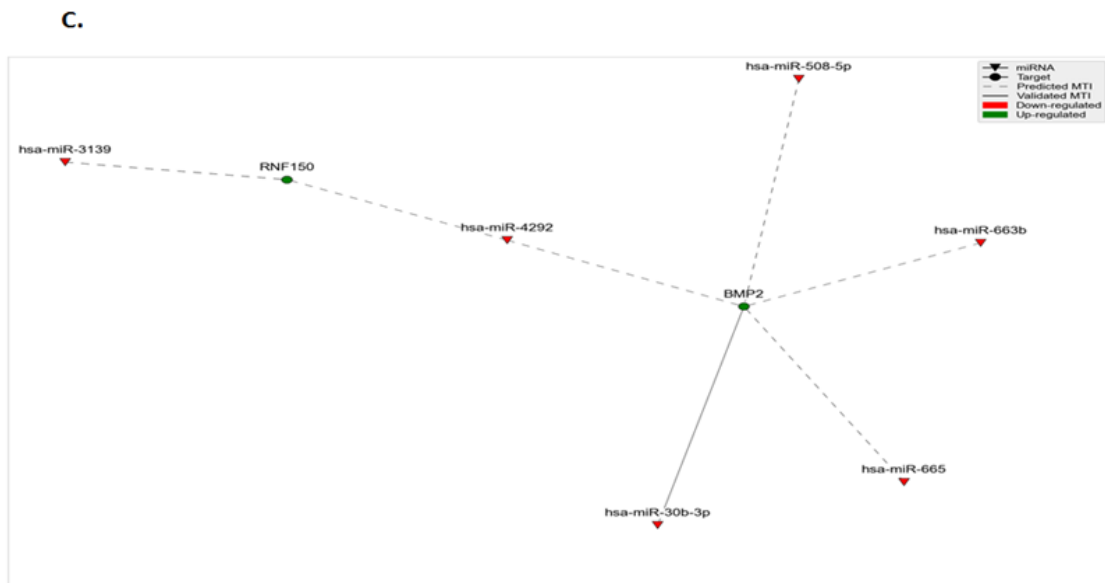

**Figure 6:** Network of miRNA: target interactions (MTIs). (A) Network of MTIs for genes upregulated in holoclones compared to parental cells. (B) Network of MTIs for genes downregulated in holoclones compared to parental cells. (C) Network of MTIs for genes upregulated in holoclone-derived tumours compared to parental tumours (n=1).

**Supplementary Table S1:** Integrin  $\alpha_2\beta_1$ , CD44 and CD133 expression in a panel of prostate cancer cell lines (n=1).

| Marker                     | DU145 | PC-3 | 22Rv1 | LNCaP |
|----------------------------|-------|------|-------|-------|
| Integrin $\alpha_2\beta_1$ | 100   | 100  | 100   | 100   |
| CD44                       | 97.9  | 96.5 | 97.7  | 83    |
| CD133                      | 2.05  | 3.47 | 2.3   | 16.9  |

**Table S2:** Genes up- and downregulated in both PC-3 and DU145-derived holoclones. Genes shown are those with a Log2 Fold Change greater than 1.5.

| Upregulated |        |          |          | Downregulated |
|-------------|--------|----------|----------|---------------|
| AKR1C1      | FOS    | MAN1A1   | SLC22A23 | ASNS          |
| ARRB1       | FOSB   | MEGF9    | SLC2A12  | CST6          |
| ARRDC4      | GBP2   | MX2      | SLC5A3   | DDIT3         |
| B3GNT7      | GPX2   | NFKBIZ   | SNN      | GALNT9        |
| BCL6        | HHIPL2 | NR4A2    | TNFSF10  | HOXB9         |
| C10orf10    | IFITM1 | OAS1     | TP53INP1 | IL11          |
| CCDC64      | KAL1   | PCDHGB2  | TXNIP    | IL24          |
| CEMIP       | KCNMB4 | PCSK9    | ZNF117   | STC2          |
| CLU         | KITLG  | PLCH1    |          | UPP1          |
| CYBRD1      | LPCAT1 | SCNN1A   |          | VEGF          |
| EGR1        | LYPD3  | SELENBP1 |          | WNT10A        |

**Table S3:** Genes up- and downregulated in murine tumours derived from both PC-3 and DU145 holoclones. Genes shown are those with a Log2 Fold Change greater than 1.5.

| Upregulated | Downregulated |
|-------------|---------------|
| BMP2        | MUC6          |
| RNF150      | S100P         |

**Table S4:** Shared changes in miRNAs in holoclones derived from PC-3 and DU145 cell lines. miRNAs shown are those with a Log2 fold-change greater than 1.5.

| Downregulated   |                 |                 | Upregulated      |                 |
|-----------------|-----------------|-----------------|------------------|-----------------|
| hsa-miR-6765-5p | hsa-miR-6800-3p | hsa-miR-1252-3p | hsa-miR-20b-5p   | hsa-miR-5192    |
| hsa-miR-619-5p  | hsa-miR-7111-3p | hsa-miR-3944-3p | hsa-miR-27a-5p   | hsa-miR-8068    |
| hsa-miR-4632-5p | hsa-miR-573     | hsa-miR-375     | hsa-miR-454-5p   | hsa-miR-132-3p  |
| hsa-miR-6127    | hsa-miR-6865-3p | hsa-miR-494-5p  | hsa-miR-26a-2-3p | hsa-miR-340-5p  |
| hsa-miR-6893-5p | hsa-miR-4706    | hsa-miR-5096    | hsa-miR-934      | hsa-miR-4637    |
| hsa-miR-4783-3p | hsa-miR-4279    | hsa-miR-744-3p  | hsa-miR-4269     | hsa-miR-373-3p  |
| hsa-miR-664a-3p | hsa-miR-146-5p  | hsa-miR-653-3p  | hsa-miR-3173-5p  | hsa-miR-3122    |
| hsa-miR-4766-5p | hsa-let-7f-1-3p | hsa-miR-6752-3p | hsa-miR-6751-5p  | hsa-miR-4499    |
| hsa-miR-2682-3p | hsa-miR-876-3p  | hsa-miR-340-3p  | hsa-miR-190a-5p  | hsa-miR-515-3p  |
| hsa-miR-5703    | hsa-miR-6090    | hsa-miR-10b-5p  | hsa-miR-182-3p   | hsa-miR-1307-5p |
| hsa-miR-6759-5p | hsa-miR-6720-3p |                 | hsa-miR-433-5p   | hsa-miR-301b-5p |
| hsa-miR-6793-3p | hsa-miR-665     |                 | hsa-miR-5587-3p  | hsa-miR-193a-3p |
| hsa-miR-670-5p  | hsa-miR-6794-5p |                 | hsa-miR-7702     | hsa-miR-498     |
| hsa-miR-7155-3p | hsa-miR-3940-5p |                 | hsa-miR-128-2-5p | hsa-miR-4655-3p |
| hsa-miR-3928-3p | hsa-miR-6785-5p |                 | hsa-miR-616-5p   | hsa-miR-32-5p   |
| hsa-miR-500a-3p | hsa-miR-6746-3p |                 | hsa-miR-4451     | hsa-miR-19b-3p  |

**Table S5:** Shared miRNAs that are downregulated in murine tumours derived from PC-3 and DU145 holoclones. miRNAs shown are those with a Log2 fold-change greater than 1.5.

| <b>Downregulated</b> |                  |                  |
|----------------------|------------------|------------------|
| hsa-miR-3174         | hsa-miR-6792-5p  | hsa-miR- 7109-5p |
| hsa-miR-508-5p       | hsa-miR-940      | hsa-miR-4256     |
| hsa-miR-7109-3p      | hsa-miR- 6765-3p | hsa-miR-3940-3p  |
| hsa-miR-6769a-3p     | hsa-miR-2114-5p  | hsa-miR-619-5p   |
| hsa-miR-3617-5p      | hsa-miR- 491-5p  | hsa-miR-6810-5p  |
| hsa-miR-4302         | hsa-miR-6132     | hsa-miR-5701     |
| hsa-miR-6813-3p      | hsa-miR- 5585-3p | hsa-miR-503-3p   |
| hsa-miR-33a-3p       | hsa-miR-663b     | hsa-miR-675-5p   |
| hsa-miR-296-3p       | hsa-miR- 6872-3p | hsa-miR-744-3p   |
| hsa-miR-1233-5p      | hsa-miR-6785-5p  | hsa-miR-4284     |
| hsa-miR- 4644        | hsa-miR- 937-3p  | hsa-miR-1180-3p  |
| hsa-miR-4683         | hsa-miR-3651     | hsa-miR-8063     |
| hsa-miR-1301-3p      | hsa-miR- 4292    | hsa-miR-4286     |
| hsa-miR-665          | hsa-miR-6068     | hsa-miR-4533     |
| hsa-miR-5006-3p      | hsa-miR- 4674    | hsa-miR-3139     |
| hsa-miR-182-3p       | hsa-miR-4801     | hsa-miR-4268     |
| hsa-miR-636          | hsa-miR-4739     | hsa-miR-8074     |
| hsa-miR-381-3p       | hsa-miR- 4767    | hsa-miR-4638-3p  |
| hsa-miR-23a-5p       | hsa-miR-1537-5p  | hsa-miR-766-5p   |
| hsa-miR-664a-3p      | hsa-miR- 1265    | hsa-miR-616-5p   |
| hsa-miR-6859-3p      | hsa-miR-4707-5p  | hsa-miR-4789-3p  |
| hsa-miR-30b-3p       | hsa-miR- 424-3p  | hsa-miR-331-3p   |
| hsa-miR-6790-3p      | hsa-miR-323a-5p  | hsa-miR-5787     |
| hsa-miR-4734         | hsa-miR-324-3p   | hsa-miR-4787-5p  |
| hsa-miR-4764-5p      | hsa-miR- 7108-5p | hsa-miR-4664-5p  |
| hsa-miR-6752-3p      | hsa-miR-6727-5p  | hsa-miR-3129-3p  |
| hsa-miR-4532         | hsa-miR- 4726-5p | hsa-miR-100-3p   |
| hsa-miR-3928-3p      | hsa-miR-3607-3p  | hsa-miR-3939     |
| hsa-miR-6889-5p      | hsa-miR-4690-5p  | hsa-miR-6075     |

**Table S6: MTI network data for dysregulated genes in holoclones vs. parental cells.**

| miRNA           | Symbol   | Status    | Source     |
|-----------------|----------|-----------|------------|
| hsa-let-7f-1-3p | BCL6     | Validated | miRWalk    |
| hsa-let-7f-1-3p | CLU      | Validated | miRWalk    |
| hsa-let-7f-1-3p | EGR1     | Validated | miRWalk    |
| hsa-let-7f-1-3p | KITLG    | Validated | miRWalk    |
| hsa-miR-10b-5p  | BCL6     | Predicted | TargetScan |
| hsa-miR-10b-5p  | HHIPL2   | Predicted | miRWalk    |
| hsa-miR-10b-5p  | SLC5A3   | Predicted | miRWalk    |
| hsa-miR-132-3p  | EGR1     | Predicted | TargetScan |
| hsa-miR-132-3p  | KITLG    | Predicted | TargetScan |
| hsa-miR-132-3p  | MX2      | Predicted | miRWalk    |
| hsa-miR-132-3p  | NR4A2    | Predicted | TargetScan |
| hsa-miR-146b-5p | EGR1     | Predicted | miRTar     |
| hsa-miR-146b-5p | FOS      | Validated | miRWalk    |
| hsa-miR-146b-5p | TNFSF10  | Validated | miRWalk    |
| hsa-miR-146b-5p | ZNF117   | Predicted | miRTar     |
| hsa-miR-146b-5p | ZNF117   | Predicted | miRWalk    |
| hsa-miR-182-3p  | EGR1     | Validated | miRWalk    |
| hsa-miR-190a-5p | TNFSF10  | Predicted | miRWalk    |
| hsa-miR-190a-5p | TP53INP1 | Predicted | TargetScan |
| hsa-miR-190a-5p | TP53INP1 | Predicted | miRWalk    |
| hsa-miR-193a-3p | BCL6     | Predicted | miRTar     |
| hsa-miR-193a-3p | LPCAT1   | Predicted | miRTar     |
| hsa-miR-193a-3p | PLCH1    | Predicted | miRWalk    |
| hsa-miR-193a-3p | SCNN1A   | Predicted | miRTar     |
| hsa-miR-193a-3p | SLC22A23 | Predicted | miRTar     |
| hsa-miR-193a-3p | STC2     | Predicted | miRTar     |
| hsa-miR-193a-3p | TP53INP1 | Predicted | miRTar     |
| hsa-miR-193a-3p | TP53INP1 | Predicted | miRWalk    |
| hsa-miR-19b-3p  | ARRDC4   | Predicted | TargetScan |
| hsa-miR-19b-3p  | ARRDC4   | Predicted | miRWalk    |
| hsa-miR-19b-3p  | STC2     | Predicted | miRWalk    |
| hsa-miR-19b-3p  | TP53INP1 | Predicted | TargetScan |
| hsa-miR-19b-3p  | WNT10A   | Predicted | TargetScan |
| hsa-miR-20b-5p  | CYBRD1   | Predicted | TargetScan |
| hsa-miR-20b-5p  | IL11     | Predicted | miRWalk    |
| hsa-miR-20b-5p  | MEGF9    | Predicted | miRWalk    |
| hsa-miR-20b-5p  | NR4A2    | Predicted | TargetScan |
| hsa-miR-20b-5p  | NR4A2    | Predicted | miRWalk    |
| hsa-miR-20b-5p  | SLC22A23 | Predicted | TargetScan |
| hsa-miR-20b-5p  | SLC5A3   | Predicted | TargetScan |
| hsa-miR-20b-5p  | TP53INP1 | Predicted | TargetScan |
| hsa-miR-20b-5p  | TP53INP1 | Predicted | miRWalk    |
| hsa-miR-20b-5p  | TXNIP    | Predicted | TargetScan |
| hsa-miR-20b-5p  | TXNIP    | Predicted | miRWalk    |
| hsa-miR-27a-5p  | KITLG    | Validated | miRWalk    |
| hsa-miR-3122    | KAL1     | Predicted | miRTar     |
| hsa-miR-3122    | KITLG    | Predicted | miRTar     |
| hsa-miR-3122    | MX2      | Predicted | miRTar     |
| hsa-miR-3122    | SLC2A12  | Predicted | miRTar     |

| miRNA          | Symbol   | Status    | Source     |
|----------------|----------|-----------|------------|
| hsa-miR-3122   | UPP1     | Predicted | miRTar     |
| hsa-miR-32-5p  | ARRDC4   | Predicted | TargetScan |
| hsa-miR-32-5p  | ARRDC4   | Validated | miRTarBase |
| hsa-miR-32-5p  | ARRDC4   | Predicted | miRWalk    |
| hsa-miR-32-5p  | SNN      | Predicted | TargetScan |
| hsa-miR-32-5p  | SNN      | Predicted | miRWalk    |
| hsa-miR-340-5p | CCDC64   | Predicted | TargetScan |
| hsa-miR-340-5p | EGR1     | Predicted | TargetScan |
| hsa-miR-340-5p | LPCAT1   | Predicted | TargetScan |
| hsa-miR-340-5p | LPCAT1   | Validated | miRTarBase |
| hsa-miR-340-5p | NR4A2    | Predicted | TargetScan |
| hsa-miR-340-5p | SLC5A3   | Predicted | TargetScan |
| hsa-miR-340-5p | TNFSF10  | Predicted | miRWalk    |
| hsa-miR-373-3p | BCL6     | Predicted | TargetScan |
| hsa-miR-373-3p | CST6     | Predicted | miRWalk    |
| hsa-miR-373-3p | CYBRD1   | Predicted | TargetScan |
| hsa-miR-373-3p | NR4A2    | Predicted | TargetScan |
| hsa-miR-373-3p | NR4A2    | Predicted | miRWalk    |
| hsa-miR-373-3p | SLC22A23 | Predicted | TargetScan |
| hsa-miR-373-3p | SLC2A12  | Predicted | miRWalk    |
| hsa-miR-373-3p | TP53INP1 | Predicted | TargetScan |
| hsa-miR-373-3p | TXNIP    | Predicted | TargetScan |
| hsa-miR-373-3p | TXNIP    | Validated | miRTarBase |
| hsa-miR-373-3p | TXNIP    | Validated | miRWalk    |
| hsa-miR-373-3p | ZNF117   | Predicted | miRWalk    |
| hsa-miR-375    | ARRB1    | Predicted | TargetScan |
| hsa-miR-375    | B3GNT7   | Predicted | miRTar     |
| hsa-miR-375    | LPCAT1   | Validated | miRTarBase |
| hsa-miR-375    | LYPD3    | Predicted | miRTar     |
| hsa-miR-375    | STC2     | Predicted | miRTar     |
| hsa-miR-4269   | ARRDC4   | Predicted | miRTar     |
| hsa-miR-4269   | B3GNT7   | Predicted | miRTar     |
| hsa-miR-4269   | FOS      | Predicted | miRTar     |
| hsa-miR-4269   | IFITM1   | Predicted | miRTar     |
| hsa-miR-4269   | IL24     | Predicted | miRTar     |
| hsa-miR-4269   | KAL1     | Predicted | miRTar     |
| hsa-miR-4269   | MAN1A1   | Predicted | miRTar     |
| hsa-miR-4269   | MEGF9    | Predicted | miRTar     |
| hsa-miR-4269   | NR4A2    | Predicted | miRTar     |
| hsa-miR-4269   | PCSK9    | Predicted | miRTar     |
| hsa-miR-4269   | PLCH1    | Predicted | miRTar     |
| hsa-miR-4269   | SELENBP1 | Predicted | miRTar     |
| hsa-miR-4269   | SLC22A23 | Predicted | miRTar     |
| hsa-miR-4269   | SNN      | Predicted | miRTar     |
| hsa-miR-4269   | STC2     | Predicted | miRTar     |
| hsa-miR-4269   | ZNF117   | Predicted | miRTar     |
| hsa-miR-4279   | ASNS     | Predicted | miRTar     |
| hsa-miR-4279   | BCL6     | Predicted | miRTar     |
| hsa-miR-4279   | C10orf10 | Predicted | miRTar     |
| hsa-miR-4279   | DDIT3    | Predicted | miRTar     |
| hsa-miR-4279   | EGR1     | Predicted | miRTar     |



| miRNA          | Symbol   | Status    | Source  |
|----------------|----------|-----------|---------|
| hsa-miR-4279   | FOSB     | Predicted | miRTar  |
| hsa-miR-4279   | LPCAT1   | Predicted | miRTar  |
| hsa-miR-4279   | MAN1A1   | Predicted | miRTar  |
| hsa-miR-4279   | MEGF9    | Predicted | miRTar  |
| hsa-miR-4279   | MX2      | Predicted | miRTar  |
| hsa-miR-4279   | PCSK9    | Predicted | miRTar  |
| hsa-miR-4279   | SCNN1A   | Predicted | miRTar  |
| hsa-miR-4279   | SLC22A23 | Predicted | miRTar  |
| hsa-miR-4279   | SNN      | Predicted | miRTar  |
| hsa-miR-4279   | STC2     | Predicted | miRTar  |
| hsa-miR-4279   | TP53INP1 | Predicted | miRTar  |
| hsa-miR-4279   | VGF      | Predicted | miRTar  |
| hsa-miR-498    | FOS      | Predicted | miRWalk |
| hsa-miR-498    | KAL1     | Predicted | miRTar  |
| hsa-miR-498    | SLC22A23 | Predicted | miRTar  |
| hsa-miR-515-3p | BCL6     | Predicted | miRTar  |
| hsa-miR-515-3p | CYBRD1   | Predicted | miRTar  |
| hsa-miR-515-3p | KITLG    | Predicted | miRTar  |
| hsa-miR-515-3p | LPCAT1   | Predicted | miRTar  |
| hsa-miR-515-3p | MX2      | Predicted | miRTar  |
| hsa-miR-515-3p | NFKBIZ   | Predicted | miRTar  |
| hsa-miR-515-3p | OAS1     | Predicted | miRTar  |
| hsa-miR-515-3p | SCNN1A   | Predicted | miRTar  |
| hsa-miR-515-3p | SELENBP1 | Predicted | miRTar  |
| hsa-miR-515-3p | SNN      | Predicted | miRTar  |
| hsa-miR-515-3p | TP53INP1 | Predicted | miRTar  |
| hsa-miR-515-3p | VGF      | Predicted | miRTar  |
| hsa-miR-515-3p | WNT10A   | Predicted | miRWalk |
| hsa-miR-573    | CLU      | Predicted | miRTar  |
| hsa-miR-573    | CST6     | Predicted | miRWalk |
| hsa-miR-573    | FOS      | Predicted | miRWalk |
| hsa-miR-573    | GBP2     | Predicted | miRTar  |
| hsa-miR-573    | MEGF9    | Predicted | miRTar  |
| hsa-miR-573    | NFKBIZ   | Predicted | miRTar  |
| hsa-miR-573    | NFKBIZ   | Predicted | miRWalk |
| hsa-miR-573    | PCSK9    | Predicted | miRTar  |
| hsa-miR-573    | PLCH1    | Predicted | miRTar  |
| hsa-miR-573    | SLC22A23 | Predicted | miRTar  |
| hsa-miR-573    | TNFSF10  | Predicted | miRWalk |
| hsa-miR-573    | ZNF117   | Predicted | miRTar  |
| hsa-miR-665    | ASNS     | Predicted | miRTar  |
| hsa-miR-665    | BCL6     | Predicted | miRTar  |
| hsa-miR-665    | CST6     | Predicted | miRTar  |
| hsa-miR-665    | CYBRD1   | Predicted | miRTar  |
| hsa-miR-665    | DDIT3    | Predicted | miRTar  |
| hsa-miR-665    | FOSB     | Predicted | miRTar  |
| hsa-miR-665    | GALNT9   | Predicted | miRTar  |
| hsa-miR-665    | HOXB9    | Predicted | miRTar  |
| hsa-miR-665    | IL11     | Predicted | miRTar  |
| hsa-miR-665    | KAL1     | Predicted | miRTar  |
| hsa-miR-665    | LPCAT1   | Predicted | miRTar  |

| <b>miRNA</b>   | <b>Symbol</b> | <b>Status</b> | <b>Source</b> |
|----------------|---------------|---------------|---------------|
| hsa-miR-665    | MAN1A1        | Predicted     | miRTar        |
| hsa-miR-665    | MEGF9         | Predicted     | miRTar        |
| hsa-miR-665    | MX2           | Predicted     | miRTar        |
| hsa-miR-665    | OAS1          | Predicted     | miRTar        |
| hsa-miR-665    | PCSK9         | Predicted     | miRTar        |
| hsa-miR-665    | SCNN1A        | Predicted     | miRTar        |
| hsa-miR-665    | SELENBP1      | Predicted     | miRTar        |
| hsa-miR-665    | SLC22A23      | Predicted     | miRTar        |
| hsa-miR-665    | SLC2A12       | Predicted     | miRTar        |
| hsa-miR-665    | SNN           | Predicted     | miRTar        |
| hsa-miR-665    | SNN           | Predicted     | miRWalk       |
| hsa-miR-665    | STC2          | Predicted     | miRTar        |
| hsa-miR-665    | TNFSF10       | Predicted     | miRTar        |
| hsa-miR-665    | TXNIP         | Predicted     | miRTar        |
| hsa-miR-665    | VGFB          | Predicted     | miRTar        |
| hsa-miR-665    | WNT10A        | Predicted     | miRTar        |
| hsa-miR-665    | ZNF117        | Predicted     | miRTar        |
| hsa-miR-744-3p | KCNMB4        | Predicted     | miRWalk       |
| hsa-miR-876-3p | HOXB9         | Predicted     | miRWalk       |
| hsa-miR-934    | DDIT3         | Predicted     | miRWalk       |

**Table S7: MTI network data for dysregulated genes in murine tumours (holoclonal vs. parental).**

| <b>miRNA</b>   | <b>Symbol</b> | <b>Status</b> | <b>Source</b> |
|----------------|---------------|---------------|---------------|
| hsa-miR-1265   | MUC6          | Predicted     | miRTar        |
| hsa-miR-296-3p | MUC6          | Predicted     | miRTar        |
| hsa-miR-30b-3p | BMP2          | Validated     | miRWalk       |
| hsa-miR-3139   | MUC6          | Predicted     | miRTar        |
| hsa-miR-3139   | RNF150        | Predicted     | TargetScan    |
| hsa-miR-3139   | RNF150        | Predicted     | miRTar        |
| hsa-miR-324-3p | MUC6          | Predicted     | miRTar        |
| hsa-miR-331-3p | MUC6          | Predicted     | miRWalk       |
| hsa-miR-4256   | MUC6          | Predicted     | miRTar        |
| hsa-miR-4268   | MUC6          | Predicted     | miRTar        |
| hsa-miR-4284   | MUC6          | Predicted     | miRTar        |
| hsa-miR-4292   | BMP2          | Predicted     | miRTar        |
| hsa-miR-4292   | RNF150        | Predicted     | miRTar        |
| hsa-miR-4302   | MUC6          | Predicted     | miRTar        |
| hsa-miR-491-5p | MUC6          | Predicted     | miRTar        |
| hsa-miR-508-5p | BMP2          | Predicted     | miRTar        |
| hsa-miR-508-5p | MUC6          | Predicted     | miRTar        |
| hsa-miR-628-5p | BMP2          | Predicted     | miRTar        |
| hsa-miR-628-5p | RNF150        | Predicted     | miRWalk       |
| hsa-miR-663b   | BMP2          | Predicted     | miRTar        |
| hsa-miR-663b   | MUC6          | Predicted     | miRTar        |
| hsa-miR-665    | BMP2          | Predicted     | miRTar        |
| hsa-miR-665    | MUC6          | Predicted     | miRTar        |
| hsa-miR-665    | MUC6          | Predicted     | miRWalk       |
| hsa-miR-665    | S100P         | Predicted     | miRTar        |
| hsa-miR-940    | MUC6          | Predicted     | miRTar        |
